# Supplementary material for: Highly-selective oxidation of benzyl alcohol to benzaldehyde over Co1/NC catalysts
Source: Royal Society of Chemistry journal article supplement (doi:10.1039/d4cy00259h), 2024-01-01
Supplement: d4cy00259h1.pdf [file d4cy00259h1.pdf]

## Supplementary Information

### Highly-selective oxidation of benzyl alcohol to benzaldehyde over Co<sub>1</sub>/NC catalysts

*Fan Xue<sup>a</sup>, Yanle Li<sup>b</sup>, Jingyue Bi<sup>a</sup>, Shangpu Zhuang<sup>a</sup>, Mifen Cui<sup>a</sup>, Zhaoyang Fei<sup>\*,a</sup>,  
Ziqi Tian<sup>\*,b</sup> and Xu Qiao<sup>\*,a</sup>*

<sup>a</sup> State Key Laboratory of Materials-Oriented Chemical Engineering, College of  
Chemical Engineering, Nanjing Tech University, Nanjing, Jiangsu, 211816, PR China

<sup>b</sup> Ningbo Institute of Materials Technology & Engineering, Chinese Academy of  
Sciences, Ningbo, Zhejiang, 315201, PR China

\* E-mail: [tianziqi@nimte.ac.cn](mailto:tianziqi@nimte.ac.cn) (Z. Tian).

\* E-mail: [zhaoyangfei@njtech.edu.cn](mailto:zhaoyangfei@njtech.edu.cn) (Z. Fei), Tel: +86 025 83587168, Fax: +86 025  
83587168.

\* E-mail: [qct@njtech.edu.cn](mailto:qct@njtech.edu.cn) (X. Qiao), Tel: +86 025 83172298, Fax: +86 025  
83172298.

Summary of the supporting information: 11 pages, 12 figures and 4 tables.

## Table of Contents

1. **Fig. S1** XRD patterns of Co-ZIF precursors.
2. **Fig.S2** Typical SEM images of (a<sub>1</sub>) ZIF-8, (a<sub>2</sub>) NC, (b<sub>1</sub>) 1-Co-ZIF, (b<sub>2</sub>) 1-Co<sub>1</sub>/NC, (c<sub>1</sub>) 2-Co-ZIF, (c<sub>2</sub>) 2-Co<sub>1</sub>/NC, (d<sub>1</sub>) 3-Co-ZIF, (d<sub>2</sub>) 3-Co<sub>1</sub>/NC, (e<sub>1</sub>) 4-Co-ZIF, (e<sub>2</sub>) 4-Co<sub>1</sub>/NC, (f<sub>1</sub>) Co<sub>NPs</sub>-ZIF, (f<sub>2</sub>) Co<sub>NPs</sub>/NC.
3. **Fig.S3** The pore size distributions of the (a) precursors and (b) catalysts.
4. **Fig.S4** (a) TEM image and (b) HRTEM image of Co<sub>NPs</sub>/NC catalyst.
5. **Fig.S5** The XPS spectra of Co<sub>1</sub>/NC and Co<sub>NPs</sub>/NC catalysts.
6. **Fig.S6** The Co K edge FT-EXAFS spectrum and corresponding fitting curve in R space for (a) Co<sub>NPs</sub>/NC and (b) Co foil.
7. **Fig.S7** E<sub>a</sub> value of 4-Co<sub>1</sub>/NC and Co<sub>NPs</sub>/NC catalysts.
8. **Fig.S8** Comparison of the catalytic conversion of 4-Co<sub>1</sub>/NC catalyst with those reported previously (Co-ZIF-67/GO <sup>3</sup>, Pd/GC <sup>4</sup>, Au<sub>1</sub>/CeO<sub>2</sub> <sup>5</sup>, Pd/NRGO <sup>6</sup>, 3Pd/20MnSBA <sup>7</sup>, HEO <sup>8</sup>, meso-Co<sub>3</sub>O<sub>4</sub> <sup>9</sup>, Pd/TNB <sup>10</sup>, Pd/Al<sub>2</sub>O<sub>3</sub>-N <sup>11</sup>, Co-NG-850 <sup>12</sup>.
9. **Fig.S9** Charge density difference of Co<sub>1</sub>/NC and Co<sub>NPs</sub>/NC models. The isosurface level is 0.006 eÅ<sup>-3</sup>. Yellow and cyan regions represent the accumulation and depletion of electrons.
10. **Fig.S10** Recycling results of 4-Co<sub>1</sub>/NC catalyst.
11. **Fig.S11** The XRD patterns of the fresh and used 4-Co<sub>1</sub>/NC catalysts.
12. **Fig.S12** (a) the N 1s and (b) Co 2p spectra of the fresh and the used 4-Co<sub>1</sub>/NC catalysts.
13. **Table.S1** Co contents measured by ICP-AES.
14. **Table.S2** Textural parameters of the catalysts.
15. **Table.S3** FT-EXAFS fitting results at the Co K-edge
16. **Table.S4** Comparison of different catalysts in the oxidation of benzyl alcohol

## Chemicals

Reagents zinc nitrate hexahydrate ( $\text{Zn}(\text{NO}_3)_2 \cdot 6\text{H}_2\text{O} \geq 99\%$ ), Cobalt nitrate hexahydrate ( $\text{Co}(\text{NO}_3)_2 \cdot 6\text{H}_2\text{O} > 99\%$ ), 2-methylimidazole (2-HMIM  $> 99\%$ ), 4-Bromobenzyl alcohol ( $\geq 99\%$ ), 3-Bromobenzyl alcohol ( $\geq 99\%$ ), 2-Bromobenzyl alcohol ( $\geq 99\%$ ), 4-Chlorobenzyl alcohol ( $\geq 99\%$ ), (S)-(-)-1-Phenylethanol ( $\geq 99\%$ ), 4-Hydroxybenzyl alcohol ( $\geq 99\%$ ) and Diphenylmethanol ( $\geq 99\%$ ) were purchased from Shanghai Aladdin Biochemical Technology Co.. P-Tolymethanol (98.78 %) was purchased from Bidephatm com. Methanol ( $> 99.5\%$ ), N, N-dimethylformamide (DMF,  $> 99.5\%$ ), benzaldehyde ( $> 99.5\%$ ), benzyl alcohol ( $> 99.5\%$ ) and benzoic acid ( $> 99.5\%$ ) were bought from Taicang Shanghai Trial Agent Co., Ltd, China. All the chemicals were analytical pure grade and used without further purification.

## DFT calculations

The Co atom in 4-Co<sub>1</sub>/NC catalyst was surrounded by four nitrogen atoms and Co NPs in Co<sub>NPs</sub>/NC catalyst was represented by a Co<sub>6</sub> cluster as reported.<sup>1</sup> The benzyl alcohol oxidation process was studied by calculating the energy changes of the following four reactions:<sup>2</sup>

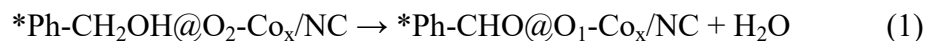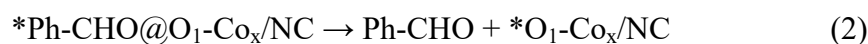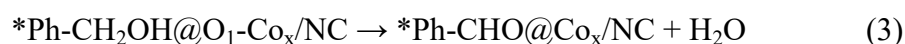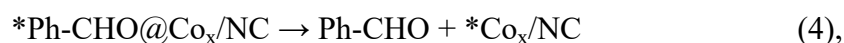

where the asterisk and @ denote to the adsorption states at different stages and Co<sub>x</sub>/NC represents 4-Co<sub>1</sub>/NC or Co<sub>NPs</sub>/NC catalyst.

## Figures

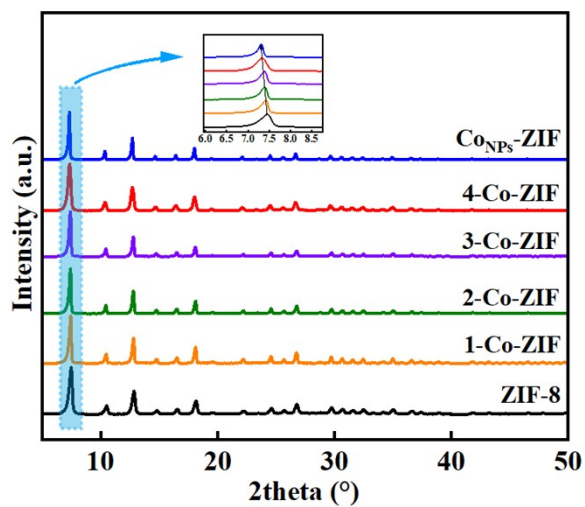

**Fig. S1** XRD patterns of Co-ZIF precursors.

The main peak of Co-ZIF precursors shifted slightly to a smaller angle compared with the pristine ZIF-8, indicating that the  $\text{Co}^{2+}$  ions partially substituted the  $\text{Zn}^{2+}$  ions.

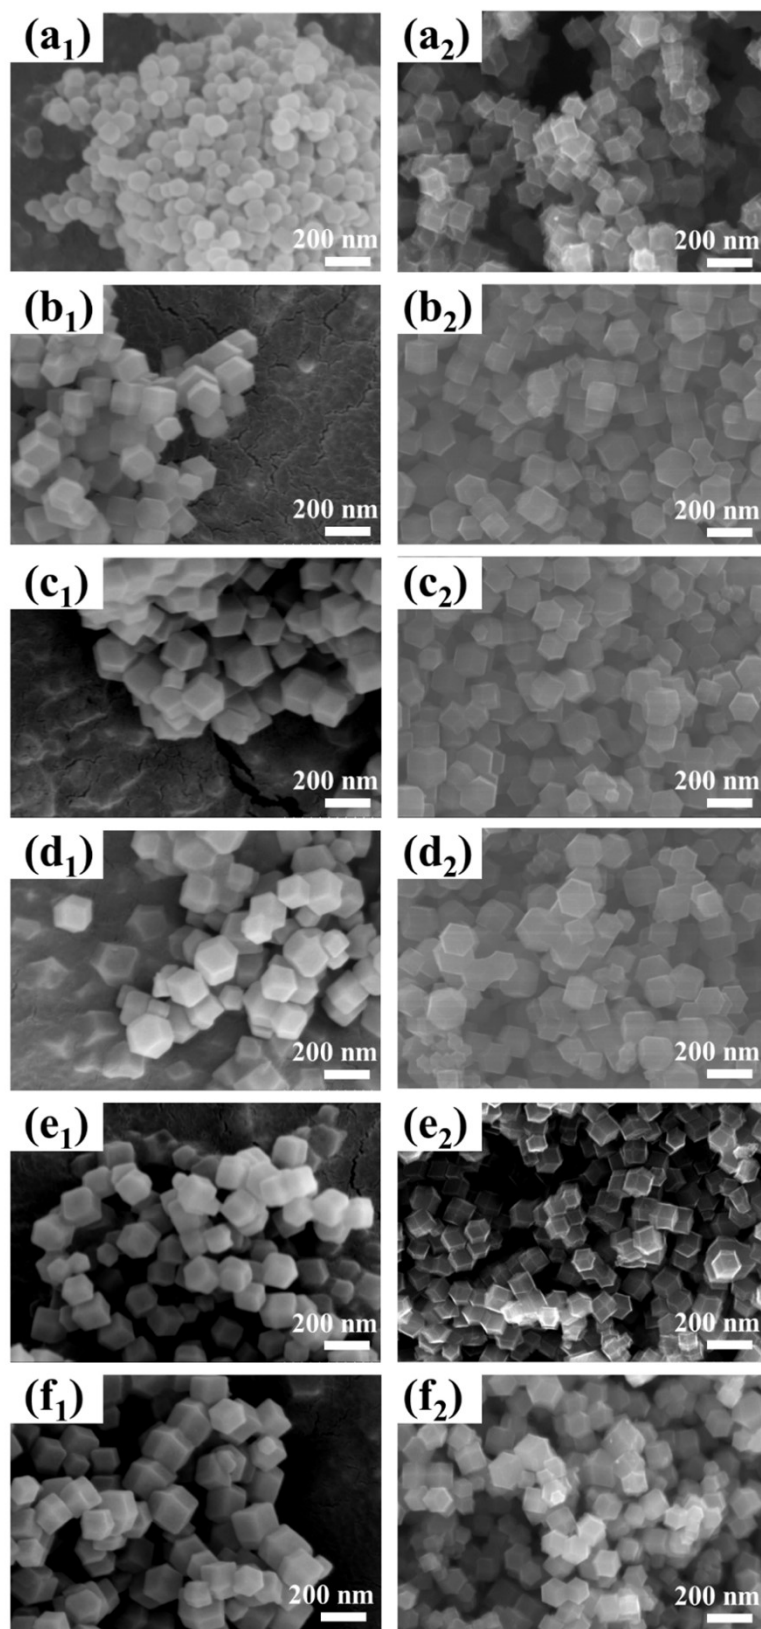

**Fig.S2** Typical SEM images of (a<sub>1</sub>) ZIF-8, (a<sub>2</sub>) NC, (b<sub>1</sub>) 1-Co-ZIF, (b<sub>2</sub>) 1-Co<sub>1</sub>/NC, (c<sub>1</sub>) 2-Co-ZIF, (c<sub>2</sub>) 2-Co<sub>1</sub>/NC, (d<sub>1</sub>) 3-Co-ZIF, (d<sub>2</sub>) 3-Co<sub>1</sub>/NC, (e<sub>1</sub>) 4-Co-ZIF, (e<sub>2</sub>) 4-Co<sub>1</sub>/NC, (f<sub>1</sub>) Co<sub>NPs</sub>-ZIF, (f<sub>2</sub>) Co<sub>NPs</sub>/NC.

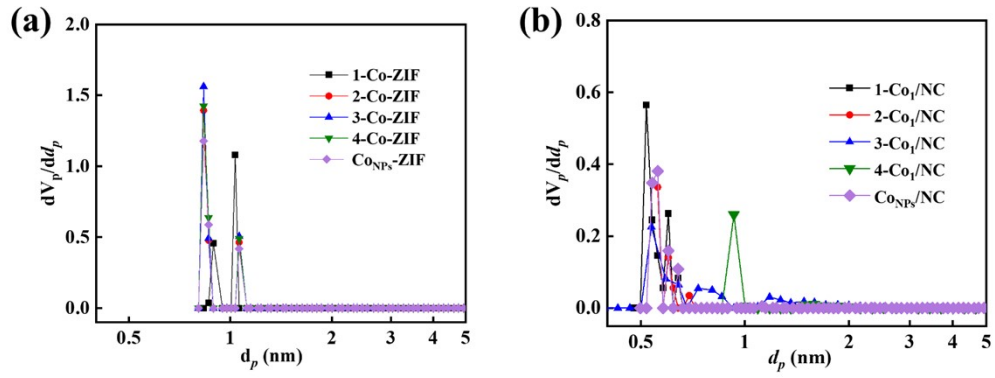

Fig.S3 The pore size distributions of the (a) precursors and (b) catalysts.

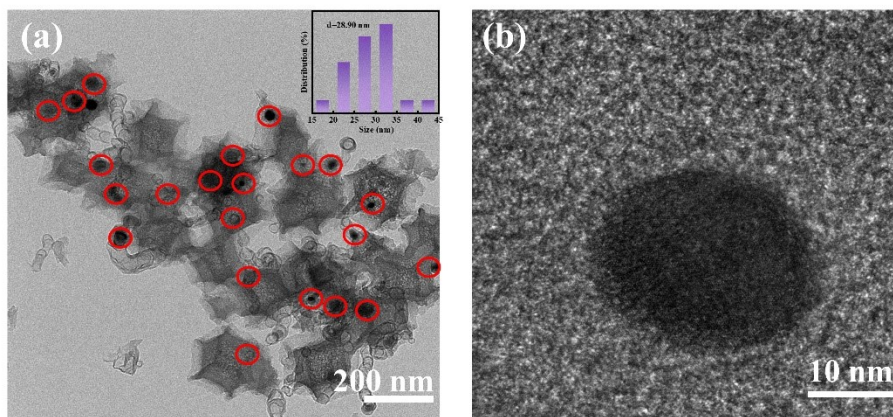

Fig.S4 (a) TEM image and (b) HRTEM image of  $\text{Co}_{\text{NPs}}/\text{NC}$  catalyst.

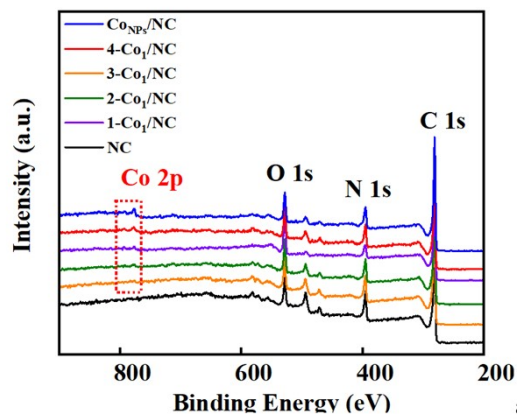

Fig.S5 The XPS spectra of  $\text{Co}_1/\text{NC}$  and  $\text{Co}_{\text{NPs}}/\text{NC}$  catalysts.

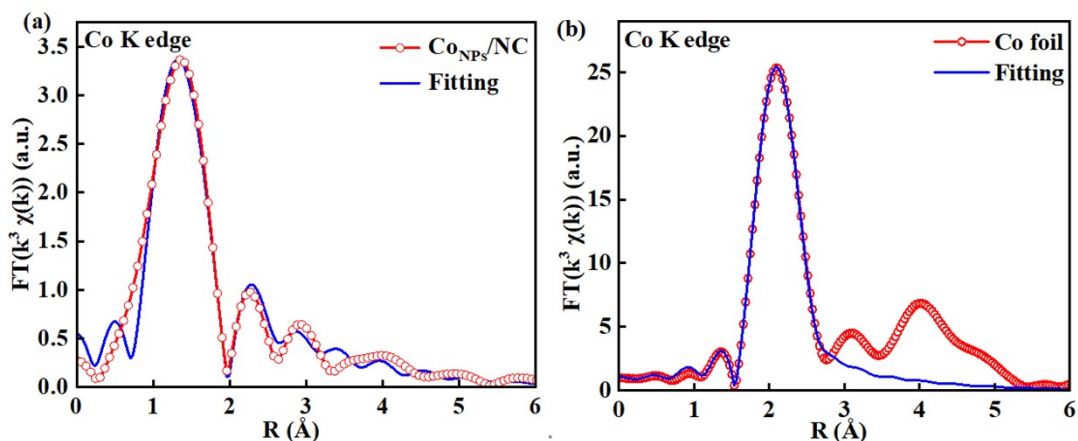

**Fig.S6** The Co K edge FT-EXAFS spectrum and corresponding fitting curve in R space for (a)  $\text{Co}_{\text{NPs}}/\text{NC}$  and (b) Co foil.

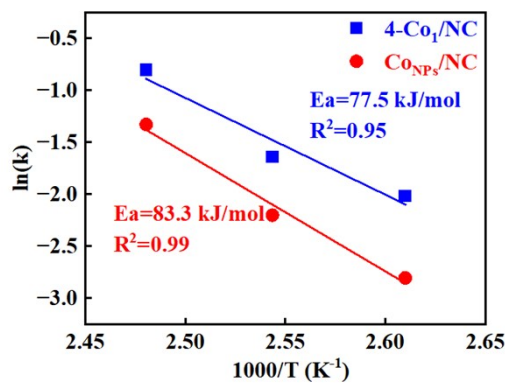

**Fig.S7**  $E_a$  value of 4- $\text{Co}_1/\text{NC}$  and  $\text{Co}_{\text{NPs}}/\text{NC}$  catalysts.

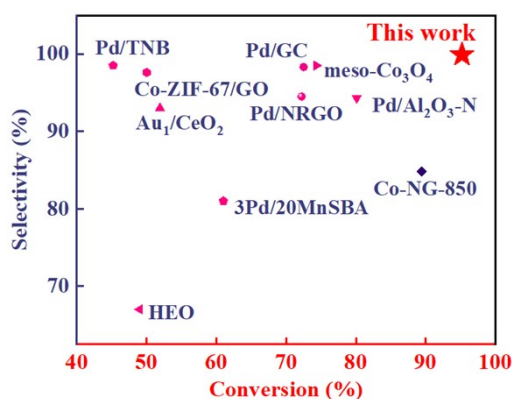

**Fig.S8** Comparison of the catalytic conversion of 4- $\text{Co}_1/\text{NC}$  catalyst with those reported previously (Co-ZIF-67/GO<sup>3</sup>, Pd/GC<sup>4</sup>, Au<sub>1</sub>/CeO<sub>2</sub><sup>5</sup>, Pd/NRGO<sup>6</sup>, 3Pd/20MnSBA<sup>7</sup>, HEO<sup>8</sup>, meso- $\text{Co}_3\text{O}_4$ <sup>9</sup>, Pd/TNB<sup>10</sup>, Pd/Al<sub>2</sub>O<sub>3</sub>-N<sup>11</sup>, Co-NG-850<sup>12</sup>).

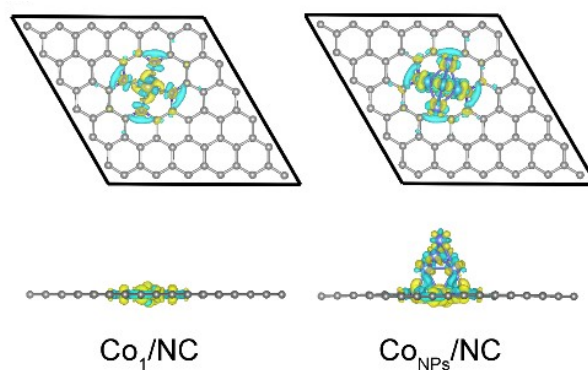

**Fig.S9** Charge density difference of  $\text{Co}_1/\text{NC}$  and  $\text{Co}_{\text{NPs}}/\text{NC}$  models. The isosurface level is  $0.006 \text{ e}\text{\AA}^{-3}$ . Yellow and cyan regions represent the accumulation and depletion of electrons.

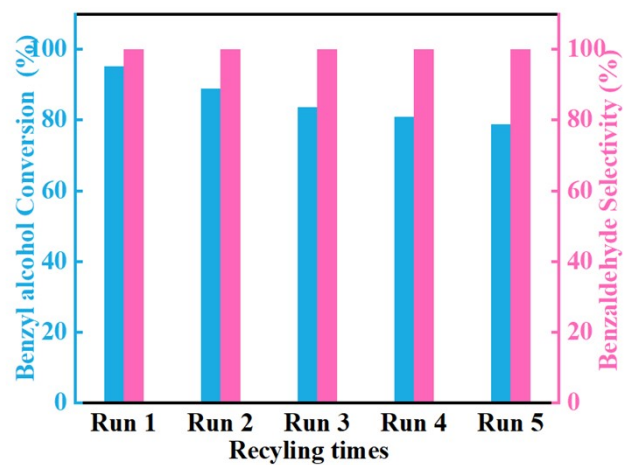

**Fig.S10** Recycling results of 4- $\text{Co}_1/\text{NC}$  catalyst.

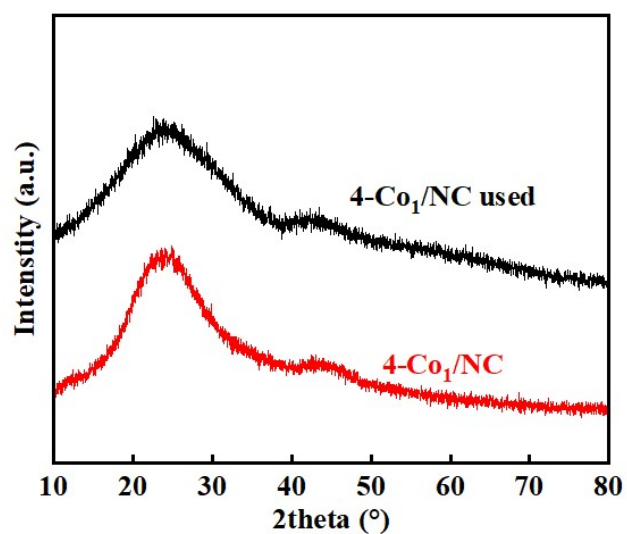

**Fig.S11** The XRD patterns of the fresh and used 4- $\text{Co}_1/\text{NC}$  catalysts.



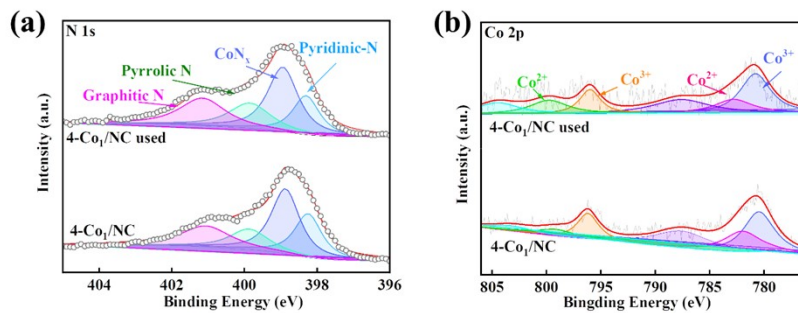

**Fig.S12** (a) the N 1s and (b) Co 2p spectra of the fresh and the used 4-Co<sub>1</sub>/NC catalysts.

## Tables

**Table.S1** Co contents measured by ICP-AES.

| Catalysts             | Metal loading (wt %) |
|-----------------------|----------------------|
| 1-Co <sub>1</sub> /NC | 0.8                  |
| 2-Co <sub>1</sub> /NC | 1.4                  |
| 3-Co <sub>1</sub> /NC | 1.6                  |
| 4-Co <sub>1</sub> /NC | 2.3                  |
| Co <sub>NPs</sub> /NC | 3.6                  |

**Table.S2** Textural parameters of the catalysts.

| Catalysts             | $S_{\text{BET}}$<br>( $\text{m}^2 \cdot \text{g}^{-1}$ ) <sup>a</sup> | N<br>(%) | Co/N  | N 1s               |             |                   |                    | Co 2p                                  |
|-----------------------|-----------------------------------------------------------------------|----------|-------|--------------------|-------------|-------------------|--------------------|----------------------------------------|
|                       |                                                                       |          |       | Pyridinic<br>N (%) | Co-N<br>(%) | Pyrrolic<br>N (%) | Graphitic<br>N (%) | Co <sup>3+</sup> /<br>Co <sup>2+</sup> |
| 1-Co <sub>1</sub> /NC | 688                                                                   | 12.0     | 0.067 | 31.1               | 28.5        | 16.1              | 24.3               | 2.48                                   |
| 2-Co <sub>1</sub> /NC | 647                                                                   | 12.1     | 0.116 | 25.8               | 32.2        | 16.1              | 25.9               | 1.73                                   |
| 3-Co <sub>1</sub> /NC | 787                                                                   | 12.2     | 0.131 | 19.9               | 35.4        | 18.8              | 25.9               | 1.71                                   |
| 4-Co <sub>1</sub> /NC | 908                                                                   | 11.6     | 0.198 | 24.4               | 37.8        | 16.4              | 21.3               | 1.63                                   |
| Co <sub>NPs</sub> /NC | 524                                                                   | 12.3     | 0.293 | 32.0               | 26.9        | 18.0              | 23.1               | 2.24                                   |

<sup>a</sup> Calculated by BET method

**Table.S3** FT-EXAFS fitting results at the Co K-edge

| Samples               | Shell | C.N <sup>a</sup> | R (Å) <sup>b</sup> | $\sigma^2$ <sup>c</sup> | $\Delta E_0$ (eV) <sup>d</sup> | R factor (%) <sup>e</sup> |
|-----------------------|-------|------------------|--------------------|-------------------------|--------------------------------|---------------------------|
| Co foil               | Co-Co | 12*              | 2.49               | 0.0053                  | -3.7                           | 0.0037                    |
| 4-Co <sub>1</sub> /NC | Co-N  | 3.9              | 2.03               | 0.0163                  | -8.5                           | 0.0078                    |
| Co <sub>NPs</sub> /NC | Co-N  | 3.9              | 2.04               | 0.0143                  | -6.7                           | 0.0209                    |
|                       | Co-Co | 12.0             | 2.56               | 0.0723                  | -6.7                           | 0.0209                    |

<sup>a</sup> C.N: coordination numbers

<sup>b</sup> R: bond distance

<sup>c</sup>  $\sigma^2$ : Debye-Waller factors

<sup>d</sup>  $\Delta E$ : the inner potential correction

<sup>e</sup> R factor: goodness of fit.

\* The experimental EXAFS fit of metal foil by fixing CN as the known crystallographic value. The obtained XAFS data was processed in Athena (version 0.9.26) for background, pre-edge line and post-edge line calibrations. Then Fourier transformed fitting was carried out in Artemis (version 0.9.26). The  $k^3$  weighting,  $k$  range of 0-12 Å<sup>-1</sup> and  $R$  range of 1-2 Å were used for the fitting. The four parameters, coordination number, bond length, and  $E_0$  shift (CN, R,  $\Delta E_0$ ) were fitted without anyone was fixed, constrained, or correlated while the  $\sigma^2$  was set.

**Table.S4** Comparison of different catalysts in the oxidation of benzyl alcohol

| Catalysts                                          | Solvent | T (°C) | t (h) | Conversion (%) | Selectivity (%) |
|----------------------------------------------------|---------|--------|-------|----------------|-----------------|
| Co-ZIF-67/GO <sup>3</sup>                          | DMF     | 100    | 8     | 50             | 97.6            |
| Pd/GC <sup>4</sup>                                 | —       | 110    | 6     | 72.5           | 98.3            |
| Au <sub>1</sub> /CeO <sub>2</sub> <sup>5</sup>     | —       | 150    | 8     | 51.9           | 93              |
| Pd/NRGO <sup>6</sup>                               | —       | 90     | 3     | 72.2           | 94.5            |
| 3Pd/20MnSBA <sup>7</sup>                           | —       | 90     | 7.5   | 61             | 81              |
| HEO <sup>8</sup>                                   | —       | 120    | 0.5   | 49             | 67              |
| meso-Co <sub>3</sub> O <sub>4</sub> <sup>9</sup>   | DMF     | 120    | 6     | 74.3           | 98.5            |
| Pd/TNB <sup>10</sup>                               | —       | 120    | 1     | 45.2           | 98.5            |
| Pd/Al <sub>2</sub> O <sub>3</sub> -N <sup>11</sup> | —       | 120    | 8     | 80.1           | 94.3            |
| Co-NG-850 <sup>12</sup>                            | DMF     | 130    | 5     | 89.4           | 84.8            |
| Au-SA/CeO <sub>2</sub> -NR <sup>13</sup>           | Toluene | 100    | 24    | 89             | 94              |

## References

1. P. E. Blöchl, Phys. Rev. B., 1994, **50**, 17953-17979.
2. K. T. Huang, H. Q. Fu, Wen Shi, H. J. Wang, Y. H. Cao a, G. X. Yang, F. Peng , Q. Wang, Z. G. Liu, B. S. Zhang and H. Yu, J. Catal. 2019, **377**, 283-292.
3. X. Yang, S. Wu, J. Hu, F. R. Xiao, P. Ling, K.B. Qiu, H. S. Qi and G. Q. Jing, Catal. Commun., 2016, **87**, 90-93.
4. G. Wu, X. Wang, N. Guan and L. Li, Appl. Catal. B., 2013, **136-137**, 177-185.
5. T. Li, F. Liu, Y. Tang, L. Li, S. Miao, Y. Su, J. Y. Zhang, J. H. Huang, H. Sun, M. Haruta, A. Q. Wang, B. T. Qiao, J. Li and T. Zhang, Angew. Chem. Int. Ed., 2018, **57**, 7795-7799.
6. Q. Wei, T. Liu, Y. Wang and L. Dai, RSC. Adv., 2019, **9**, 9620-9628.
7. Y. Li, A. Chatterjee, L. B. Chen, FL-Y. Lam and X. Hu, Mol. Catal. 2020, **488**.
8. D. Y. Feng, Y. B. Dong, L. L. Zhang, X. Ge, W. Zhang, S. Dai and Z. A. Qiao, Angew. Chem. Int. Ed., 2020, **59**, 19503-19509.
9. Q. Zhang, X. Fu, Q. Kan and J. Guan, Ind. Eng. Chem. Res., 2019, **58**, 4774-4779.
10. Y. M. Lu, H. Z. Zhu, J. W. Liu and S. H. Yu, ChemCatChem., 2015, **7**, 4131-4136.
11. X. Wang, G. Wu, N. Guan and L. Li, Appl. Catal. B., 2012, **115-116**, 7-15.
12. M. Li, S. J. Wu, X. Y. Yang, J. Hu, L. Peng, L. Bai, Q. S. Huo and J. Q. Guan, Appl. Catal. A-Gen., 2017, **543**, 61-66.
13. L. J. Lei, H. Liu, Z. W. Wu, Z. F. Qin, G. F. Wang, J. Y. Ma, L. Luo, W. B. Fan and J. G. Wang, ACS. Appl. Nano. Mater., 2019, **2**, 5214-5223.
